# Supplementary material
Source: PubMed Central journal article supplement (PMC4790792)
Supplement: denc006830.ww1_default.pdf [file denc006830.ww1_default.pdf]

## **The TRACOR Study Group**

**Principal investigator:** François Goffinet (Port-Royal maternity hospital, Paris)

**Scientific director:** Catherine Deneux-Tharaux (Inserm U953, Paris)

**Statistician:** Françoise Maillard (Inserm U953, Paris)

### **Participating centres:**

- Angers University hospital
  - Loïc Sentilhès, co-investigator
  - Cécile Rouillard, Isabel Ribeiro, Annaïck Boutin, referent midwives
  - Laëtitia Rault, clinical research assistant
- Lille University hospital
  - Emmanuel Closset, co-investigator
  - Isabelle Luttringer, Laurence Brachelet, Marie Françoise Hernout, referent midwives
  - Marie-Laurence Outtier, clinical research assistant
- Caen University hospital
  - Delphine Vardon, co-investigator
  - Céline Fossey, Claire Bouet, Magali Germaine, referent midwives
  - Sami Chaalan, clinical research assistant
- St Vincent de Paul Cochin University hospital
  - Jacques Lepercq, co-investigator
  - Marie Souteyrand, Peggy Plévy, Adeline Rideau, Sophie Decormeille, referent midwives
  - Muriel Margotonne, clinical research assistant
- Port-Royal Cochin University hospital
  - Anne Sophie Albignat, Lucile Caubit, referent midwives
  - Ahmed Abdelli, clinical research assistant

### **Data monitoring committee, Clinical research unit, URC Paris Centre, CIC Cochin-Necker, Paris**

Jean-Marc treluyer

Raphael Serreau

Laurence Lecomte

Florence Artiguebaille

Séverine Lion

Zineb Kacher

Victoria Buth
